# Supplementary material
Source: PubMed Central journal article supplement (PMC3961579)

# CRF axons

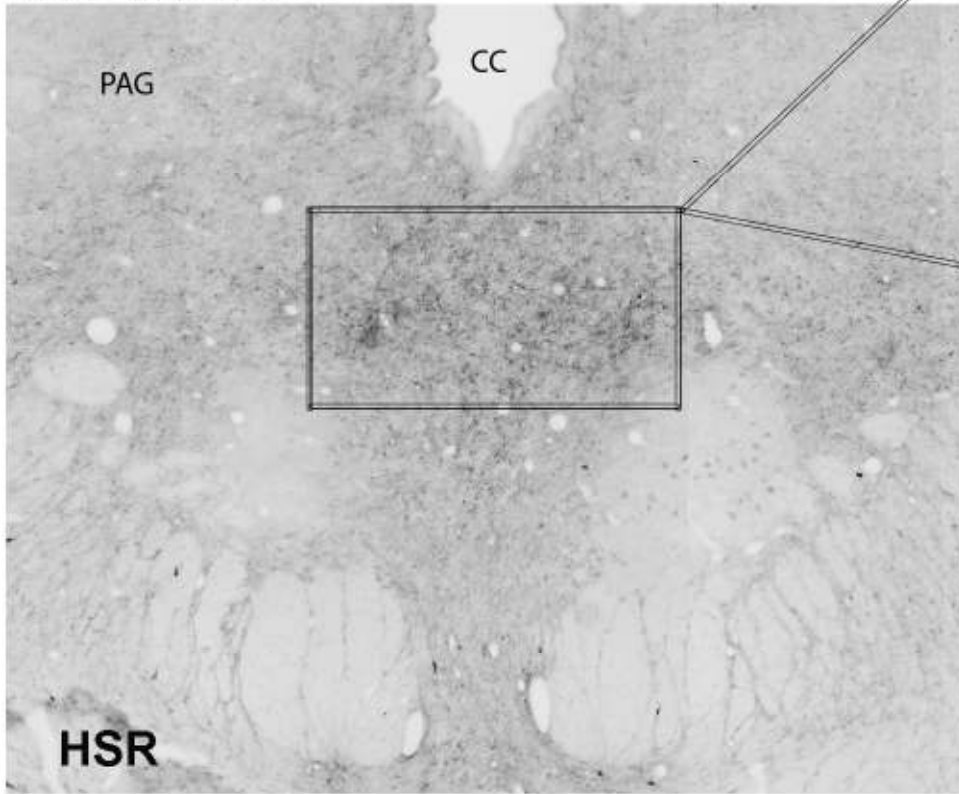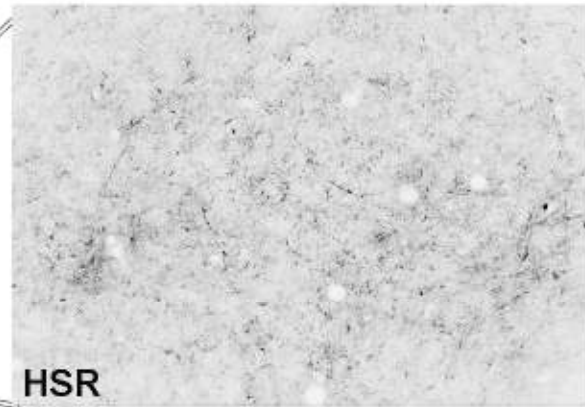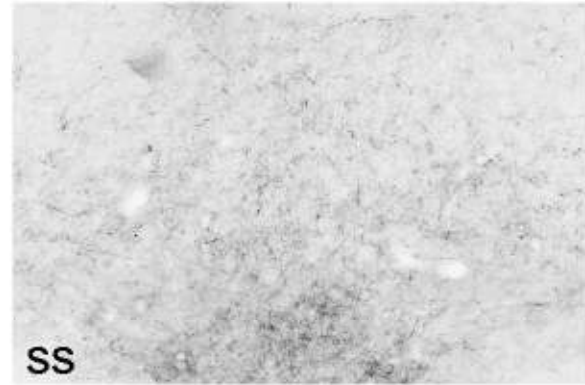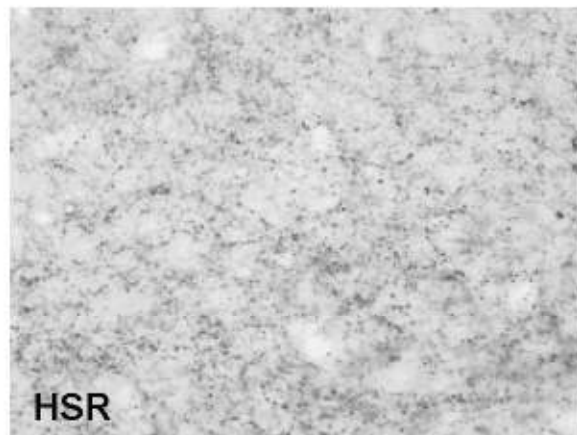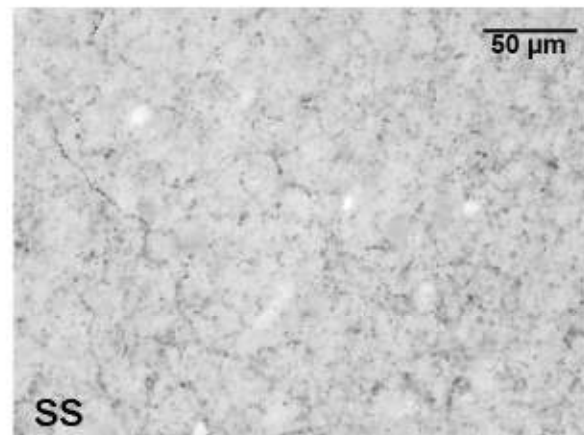

Supplement: NIHMS561095-supplement-Supplemental_Figure_1.pdf [file NIHMS561095-supplement-Supplemental_Figure_1.pdf]
